# Supplementary material
Source: publisher figshare collection journal article supplement (https://wiley.figshare.com/articles/dataset/_/3522395)
Supplement: Supplementary file 1 [file 1]

## Appendix C: Derivation of the distributions for cross-validating parameters

*Difference between the  $\mathbf{m}$  estimates, Eq. 5*

If the number of years in the parameterization and evaluation periods are set equal,  $n_e = n_p = n$ , the variance of the  $\mathbf{m}$  estimates,  $\mathbf{S}_{\mathbf{m},R}^2$ , will be the same if  $\mathbf{S}_p$  and  $\mathbf{S}_{lp}$  remain constant in the two periods. Using this assumption, we can derive the t-distribution of the t statistic in Eq. 5.

$$\begin{aligned} \frac{(\hat{\mathbf{m}}_{R,p} - \hat{\mathbf{m}}_{R,e})}{\sqrt{\frac{df_{slp} \hat{\mathbf{S}}_{slp,p}^2 + df_{slp} \hat{\mathbf{S}}_{slp,e}^2}{2df_{slp}} \left( \frac{1}{n-L} + \frac{1}{n-L} \right)}} &= \frac{(\hat{\mathbf{m}}_{R,p} - \hat{\mathbf{m}}_{R,e})}{\sqrt{\left( \frac{(n-L)\mathbf{S}_{\mathbf{m},R}^2}{n-L} + \frac{(n-L)\mathbf{S}_{\mathbf{m},R}^2}{n-L} \right)}} \frac{1}{\sqrt{\frac{df_{slp} \hat{\mathbf{S}}_{slp,p}^2 + df_{slp} \hat{\mathbf{S}}_{slp,e}^2}{2df_{slp} (n-L)\mathbf{S}_{\mathbf{m},R}^2}}} \\ &= \frac{(\hat{\mathbf{m}}_{R,p} - \hat{\mathbf{m}}_{R,e})}{\sqrt{\left( \frac{(n-L)\mathbf{S}_{\mathbf{m},R}^2}{n-L} + \frac{(n-L)\mathbf{S}_{\mathbf{m},R}^2}{n-L} \right)}} \frac{1}{\sqrt{\frac{\mathbf{S}_{slp}^2}{(n-L)\mathbf{S}_{\mathbf{m},R}^2}}} \frac{1}{\sqrt{\frac{1}{2df_{slp}} \left( \frac{df_{slp} \hat{\mathbf{S}}_{slp,p}^2}{\mathbf{S}_{slp}^2} + \frac{df_{slp} \hat{\mathbf{S}}_{slp,e}^2}{\mathbf{S}_{slp}^2} \right)}} \end{aligned}$$

This has the distribution  $\frac{1}{\sqrt{\mathbf{g}}} \text{Normal}(0,1) / \sqrt{\mathbf{C}_v^2 / \mathbf{n}}$  which has the distribution  $\frac{1}{\sqrt{\mathbf{g}}} t_v$

$$\text{where } v = 2df_{slp} \text{ and } \mathbf{g} = \frac{\mathbf{S}_{slp}^2}{(n-L)\mathbf{S}_{\mathbf{m},R}^2} = \frac{\mathbf{S}_{slp}^2}{\left( \frac{2}{L(n-L)} \mathbf{S}_{np}^2 + \mathbf{S}_p^2 \right)}.$$

The degrees of freedom,  $df_{slp}$ , are given in Appendix B.

*Ratio of the  $\mathbf{S}_{slp}^2$  estimates*

If the number of years in the parameterization and evaluation periods are set equal,  $n_e = n_p = n$ , and if we assume that the non-process and process error variance remain constant within the two periods, the expected value of  $\hat{\mathbf{S}}_{slp,p}^2$  and  $\hat{\mathbf{S}}_{slp,e}^2$  are the same and the degrees of freedom for the  $\chi^2$  distributions that approximate  $\hat{\mathbf{S}}_{slp,p}^2$  and  $\hat{\mathbf{S}}_{slp,e}^2$  are the same. Thus,

$$\frac{\hat{\mathbf{S}}_{slp,e}^2}{\hat{\mathbf{S}}_{slp,p}^2} \sim \frac{\mathbf{S}_{slp}^2 \mathbf{C}_{df_{slp}}^2 / df_{slp}}{\mathbf{S}_{slp}^2 \mathbf{C}_{df_{slp}}^2 / df_{slp}} \sim \frac{\mathbf{C}_{df_{slp}}^2}{\mathbf{C}_{df_{slp}}^2} \sim F(df_{slp}, df_{slp})$$
